# Supplementary material for: GALNTL5, which is restricted to mouse spermatids, impairs endoplasmic reticulum (ER) function through direct interaction with ER chaperone proteins
Source: PubMed Central journal article supplement (PMC11655647; doi:10.1038/s41420-024-02252-4), 2024-12-18
Supplement: 41420_2024_2252_MOESM1_ESM.pdf [file 41420_2024_2252_MOESM1_ESM.pdf]

Supplementary Table 1 List of primers designed to introduce mutations into mouse *Galntl5* and human *GALNTL5* cDNAs

| mouse <i>Galntl5</i> | sense                                      | anti-sense                                  |
|----------------------|--------------------------------------------|---------------------------------------------|
| N68K                 | 5'-GAGGT <u>TAA</u> GTTCAGATCCAGAACTT-3'   | 5'-TGAAA <u>ACTT</u> AACCTCATCATGAGTGAC-3'  |
| N140K                | 5'-GTGGT <u>GAA</u> GCTCAGTCCGCAGCATCTC-3' | 5'-ACTGAG <u>CTT</u> CACCACACTCGACACTGC-3'  |
| N353K                | 5'-CGTGCA <u>AA</u> GCAGAGTGCCTTGTCAAGG-3' | 5'-ACTCTG <u>CTT</u> TGCACGCCTGTGTTGACT-3'  |
| N390K                | 5'-TGTGGAA <u>A</u> GATTAGTGAGCGCGTGGAA-3' | 5'-ACTAAT <u>CTT</u> TCCACAGGAAACGTATGT-3'  |
| human <i>GALNTL5</i> |                                            |                                             |
| N87K                 | 5'-GATTTT <u>AAG</u> CATACAAACCCAGAACTT-3' | 5'-TGTATG <u>CTT</u> AAAAATCTGTACCTAACAT-3' |
| N140K                | 5'-GTCACG <u>AAG</u> CTCACGCCACACTATTTT-3' | 5'-CGTGAG <u>CTT</u> CGTGACACTGGACATGGT-3'  |

The mutated regions are underlined.
