# Supplementary material for: GALNTL5, which is restricted to mouse spermatids, impairs endoplasmic reticulum (ER) function through direct interaction with ER chaperone proteins
Source: PubMed Central journal article supplement (PMC11655647; doi:10.1038/s41420-024-02252-4), 2024-12-18
Supplement: 41420_2024_2252_MOESM2_ESM.pdf [file 41420_2024_2252_MOESM2_ESM.pdf]

Supplementary Table 2 List of antibodies and appropriate buffers for western blotting

| Protein name  | maker                                      | Blocking Buffer      | Dilution rate |
|---------------|--------------------------------------------|----------------------|---------------|
| GM130         | BD Transduction Laboratories <sup>TM</sup> | CanGet signal        | 1/250         |
| CREB3L4       | Santa Cruz                                 | CanGet signal        | 1/100         |
| UBE2J1        | Santa Cruz                                 | CanGet signal        | 1/100         |
| IRE1 $\alpha$ | Santa Cruz                                 | CanGet signal        | 1/100         |
| OS9           | Abcam                                      | CanGet signal        | 1/500         |
| GOPC          | Abcam                                      | CanGet signal        | 1/500         |
| Histon H3     | Proteintech                                | CanGet signal        | 1/2,000       |
| Calnexin      | Abcam                                      | 5% skim milk in TBST | 1/20,000      |
| GRP78 (BiP)   | Abcam                                      | 5% skim milk in TBST | 1/2,000       |
| HSP70         | Santa Cruz                                 | 5% skim milk in TBST | 1/200         |
| HSC70         | Abcam                                      | 5% skim milk in TBST | 1/500         |
| DYKDDDDK      | Wako                                       | 5% skim milk in TBST | 1/1,000       |
| $\beta$ actin | Wako                                       | 5% skim milk in TBST | 1/10,000      |
| GAPDH         | Wako                                       | 5% skim milk in TBST | 1/10,000      |
| GFP           | Clontech                                   | CanGet signal        | 1/2,000       |
| DsRed2        | Santa Cruz                                 | CanGet signal        | 1/100         |
| LC3           | MBL                                        | 5% skim milk in TBST | 1/1,000       |
