# Supplementary material for: GALNTL5, which is restricted to mouse spermatids, impairs endoplasmic reticulum (ER) function through direct interaction with ER chaperone proteins
Source: PubMed Central journal article supplement (PMC11655647; doi:10.1038/s41420-024-02252-4), 2024-12-18
Supplement: 41420_2024_2252_MOESM9_ESM.pdf [file 41420_2024_2252_MOESM9_ESM.pdf]

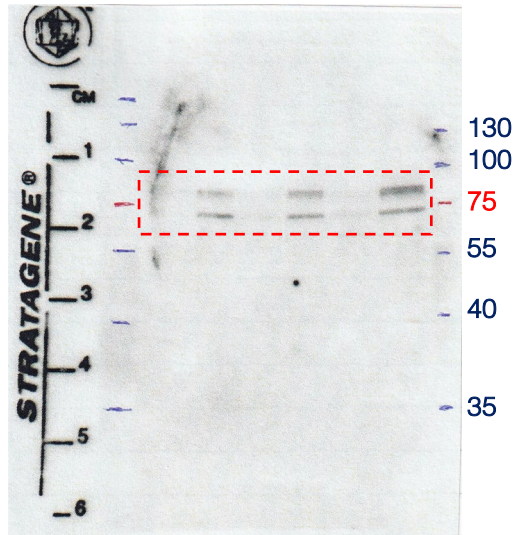

**Figure 1A**  
**GFP**

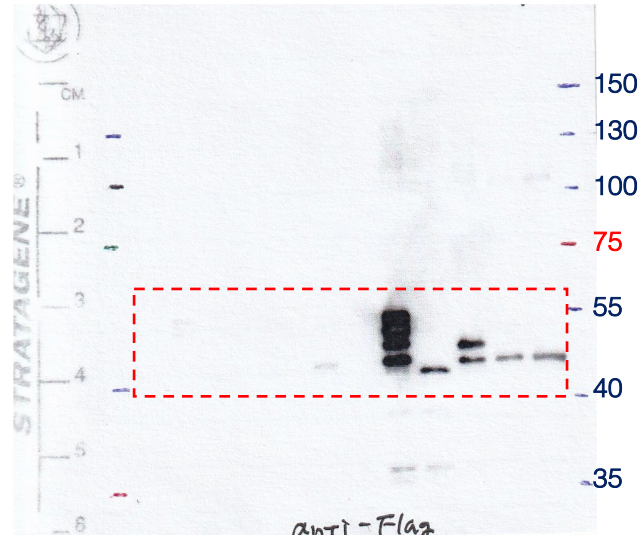

**Figure 3**  
**Flag**

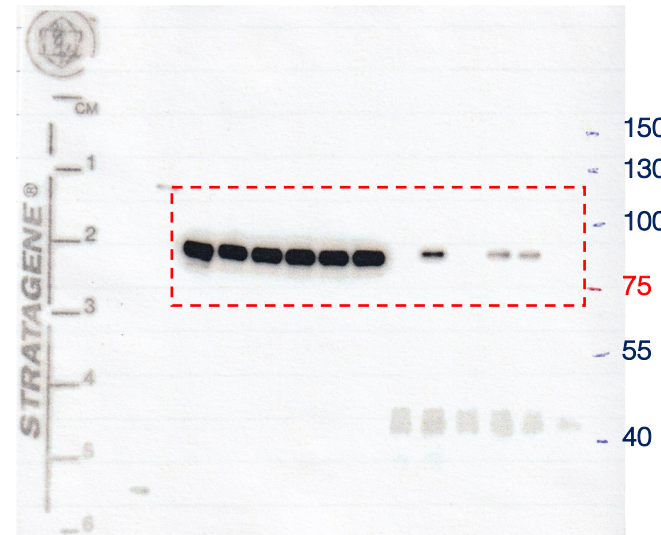

**Figure 3**  
**Calnexin**

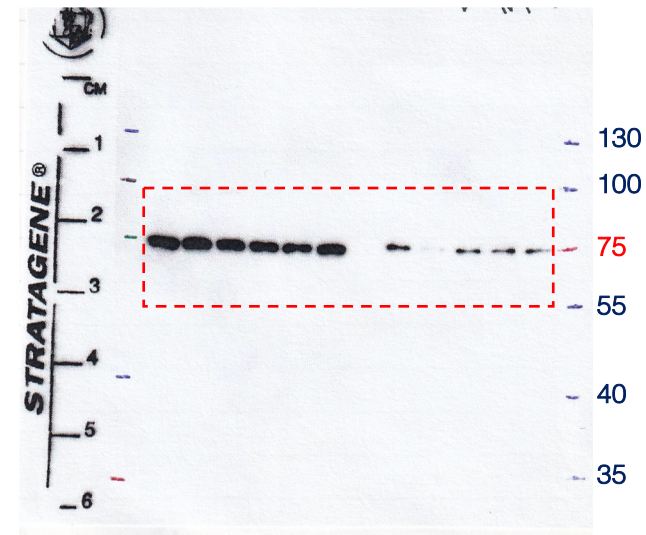

**Figure 3**  
**BiP**

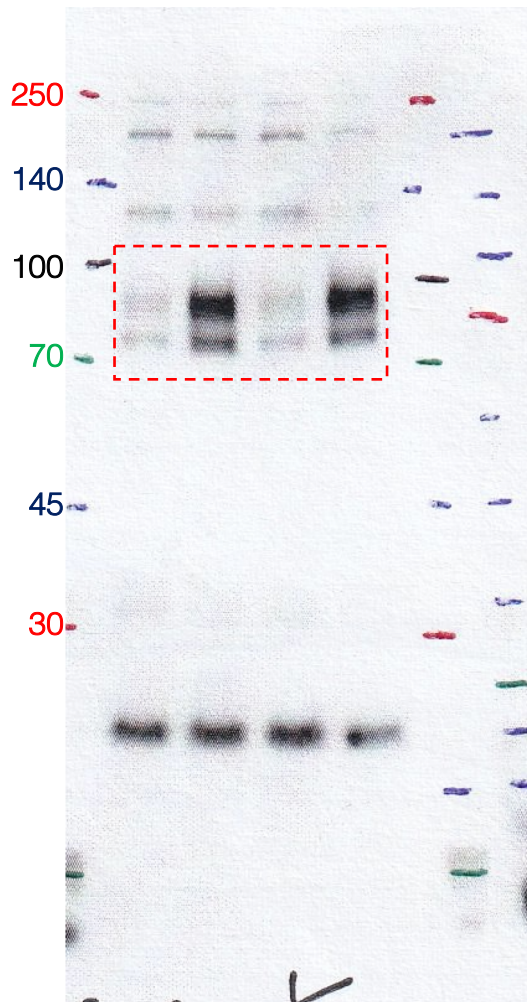

**Figure 4C  
GFP**

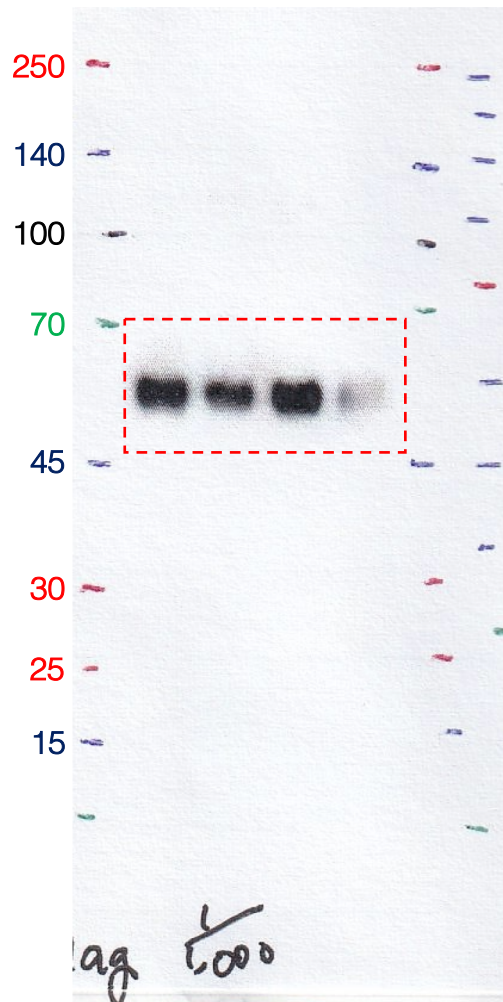

**Figure 4C  
NHK-Flag**

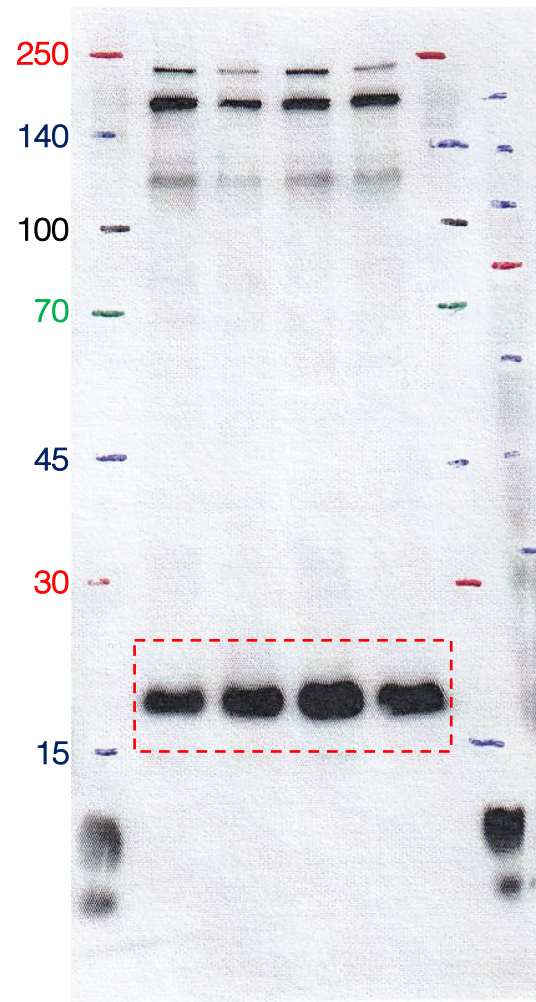

**Figure 4C  
Histone-H3**

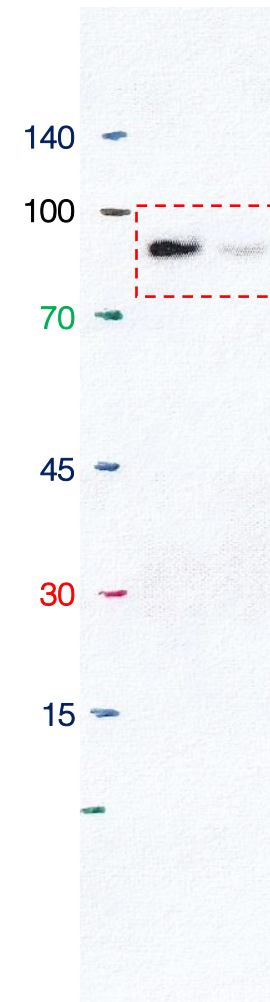

**Figure 4E  
Calnexin**

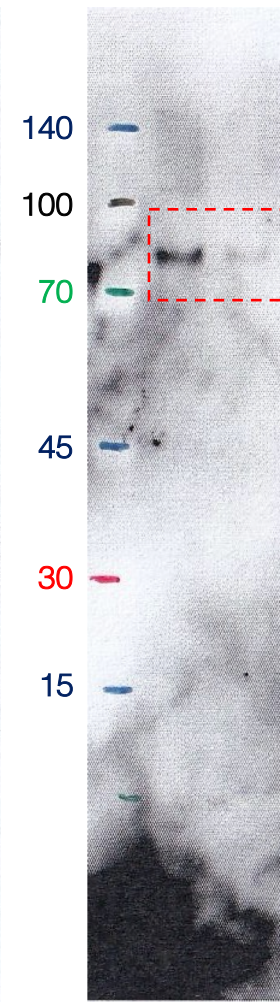

**Figure 4E  
NHK-DsRed**

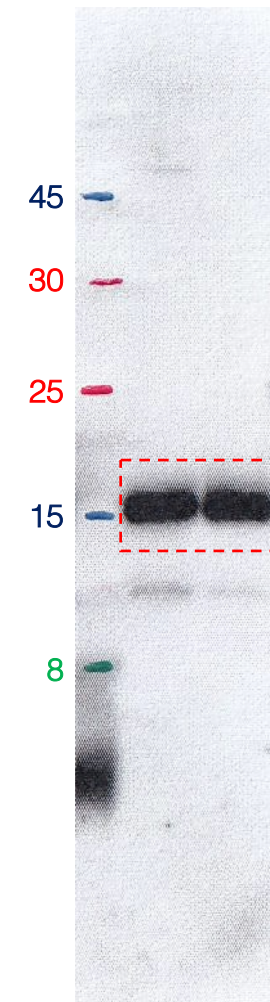

**Figure 4E  
Hsitone-H3**

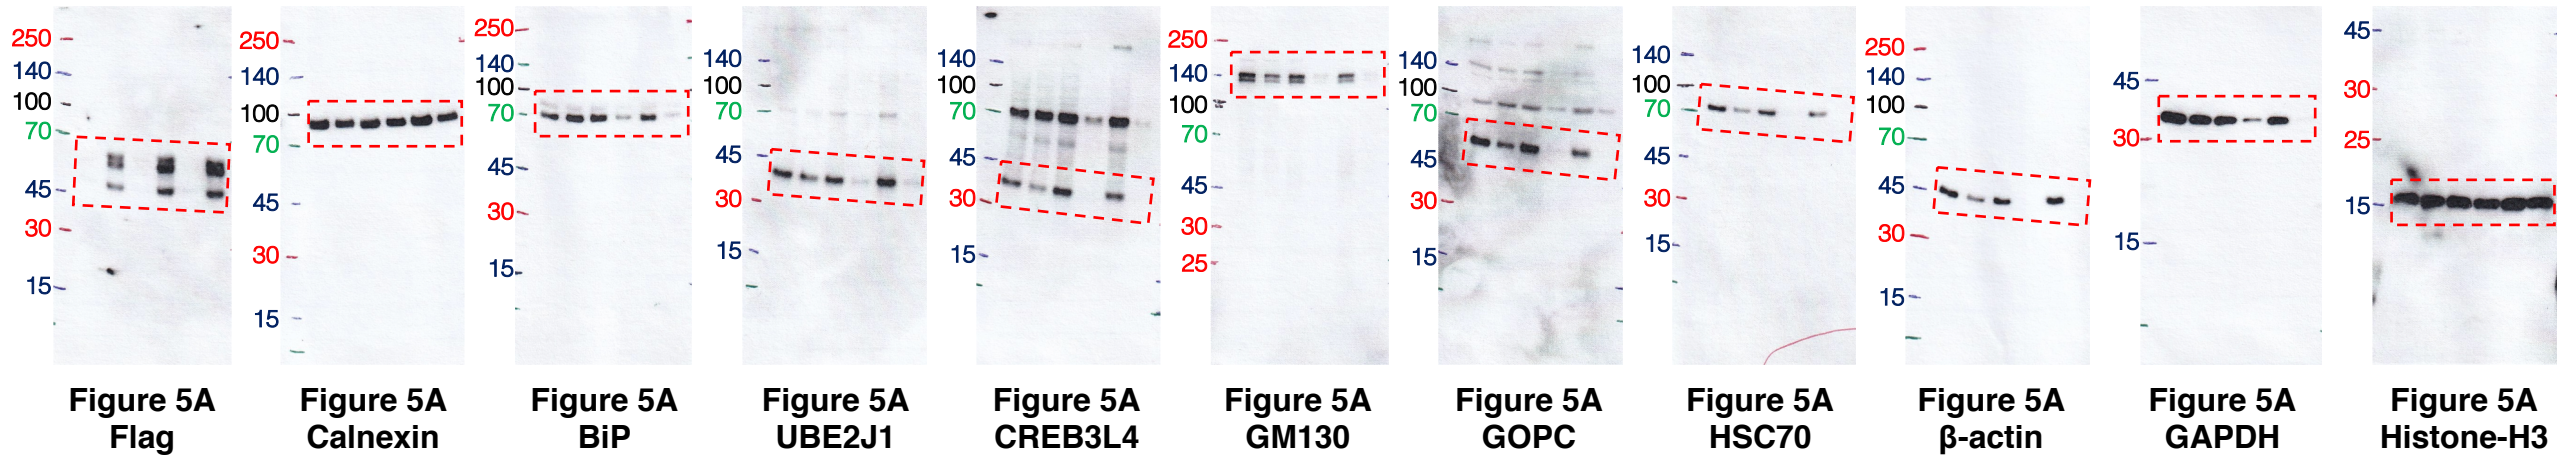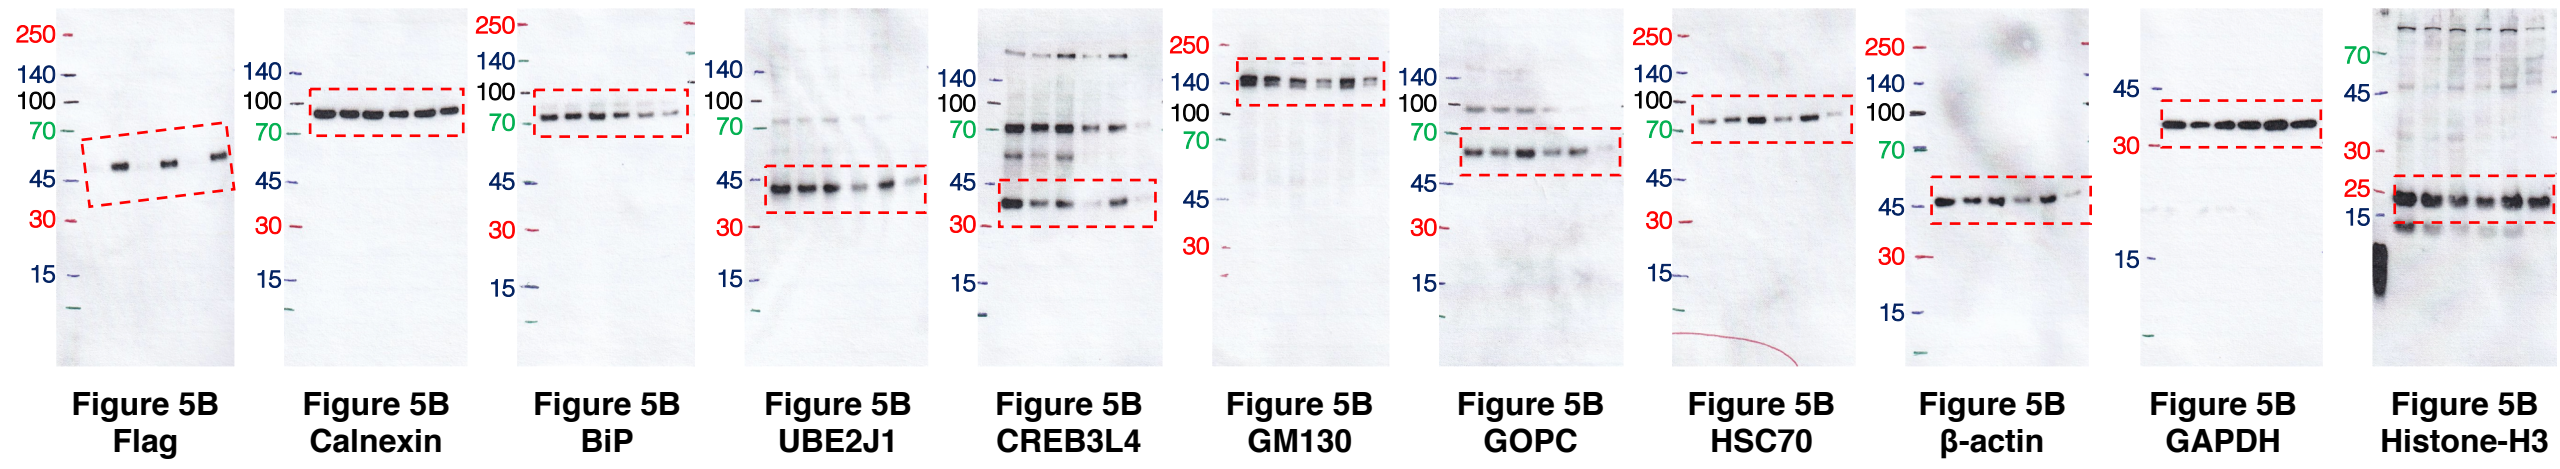

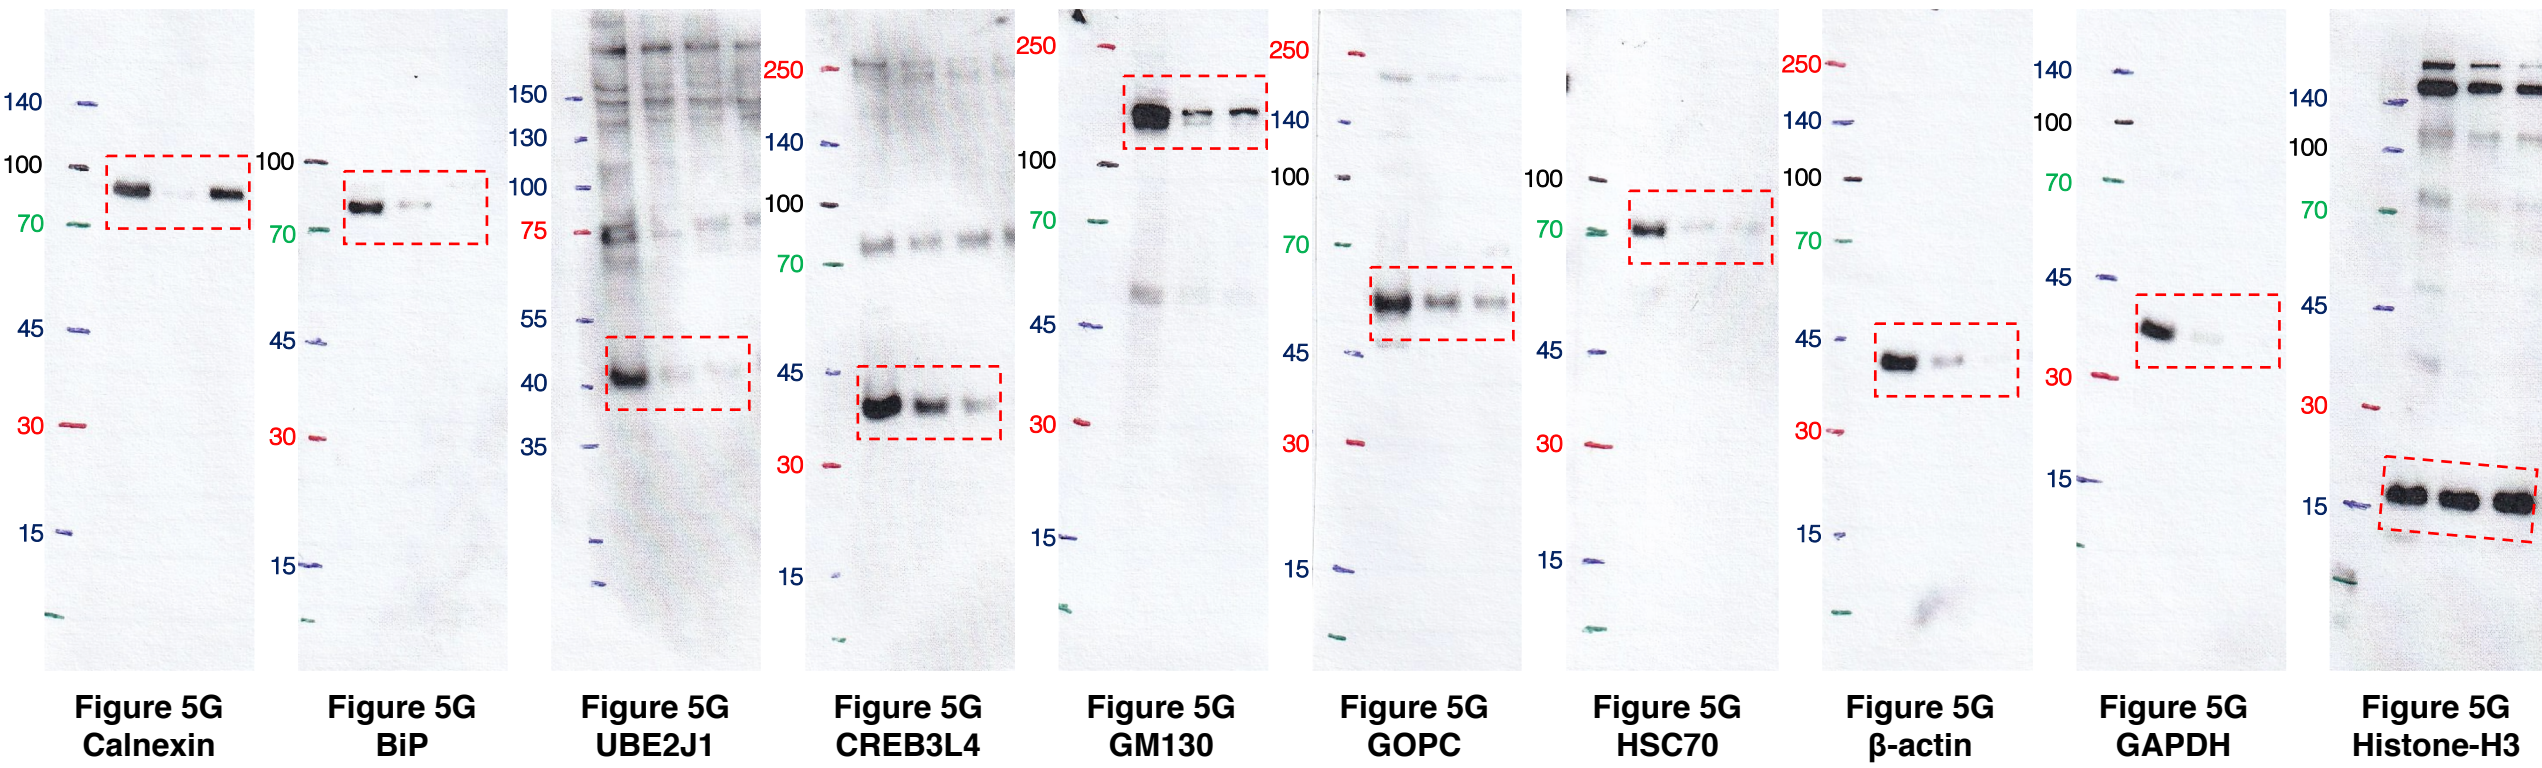

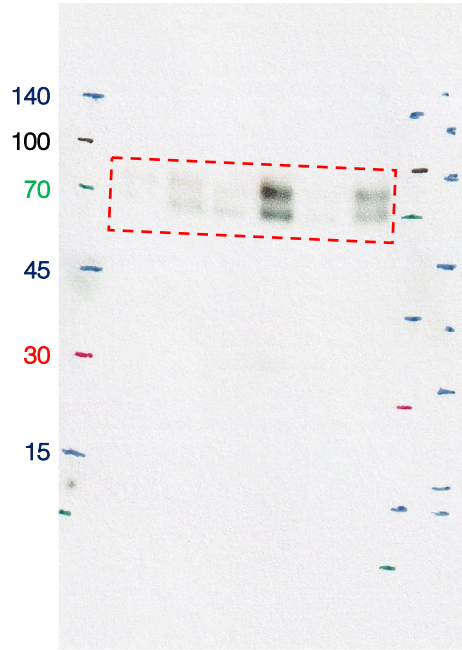

Supplementary  
Figure 1D  
GFP

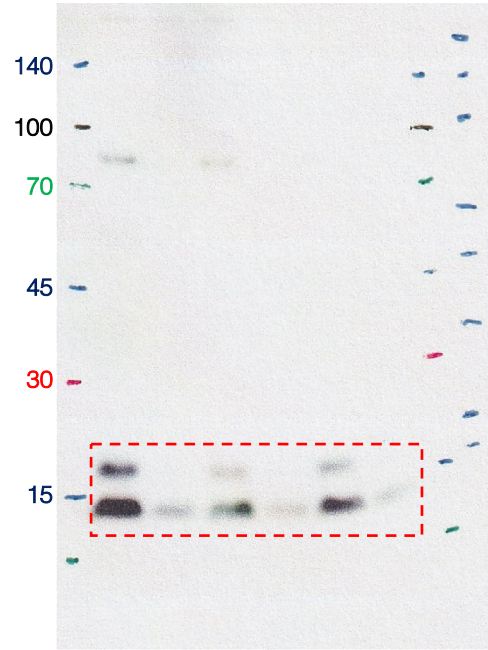

Supplementary  
Figure 1D  
LC3

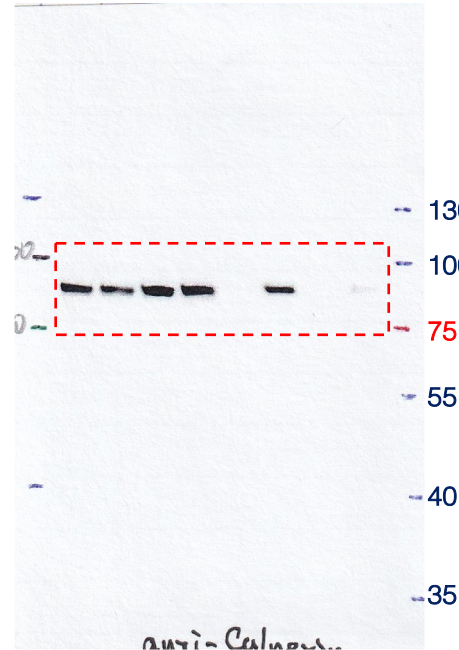

Supplementary Figure 3C  
Calnexin

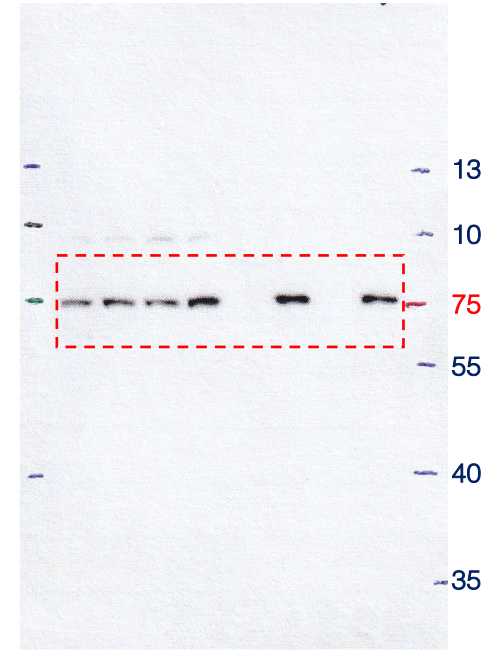

Supplementary Figure 3C  
BiP

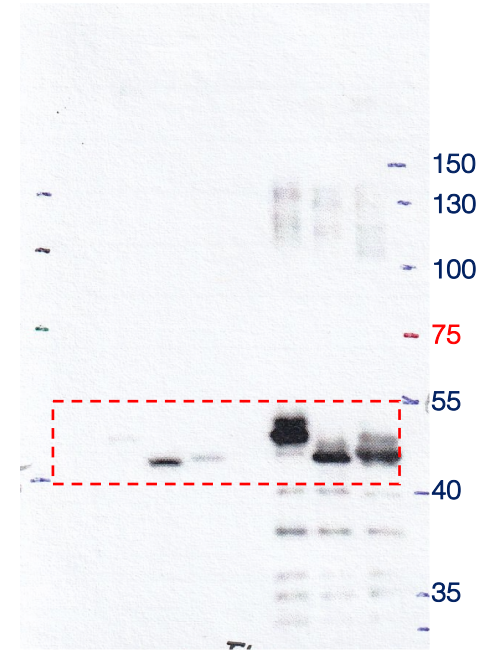

Supplementary Figure 3C  
Flag

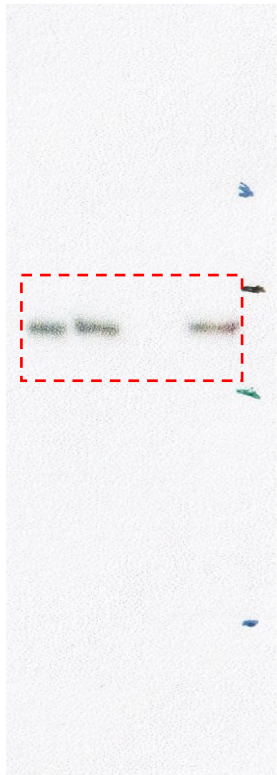

Supplementary  
Figure 2A  
Calnexin

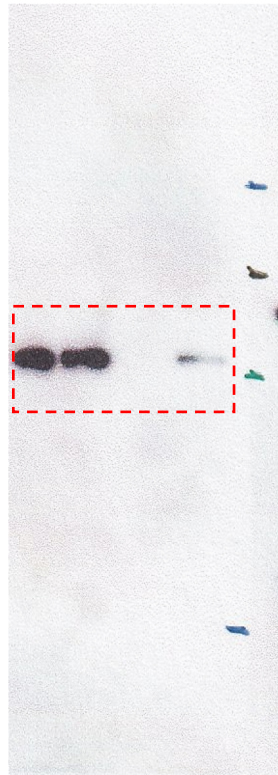

Supplementary  
Figure 2A  
BiP

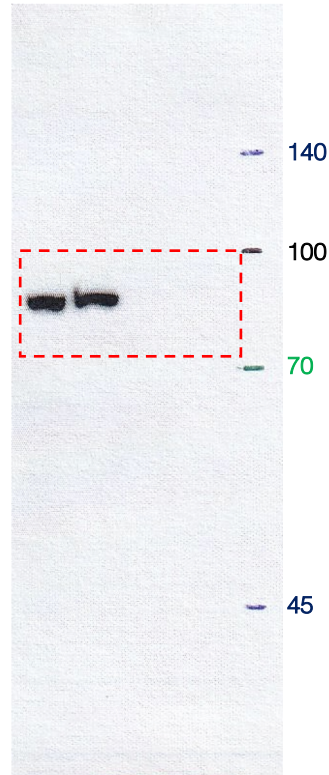

Supplementary  
Figure 2A  
HSP90

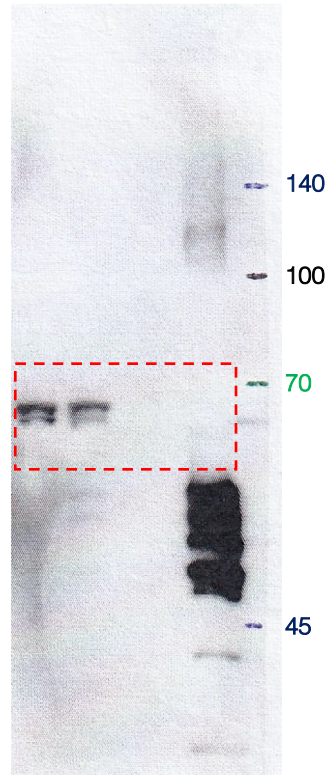

Supplementary  
Figure 2A  
HSP70

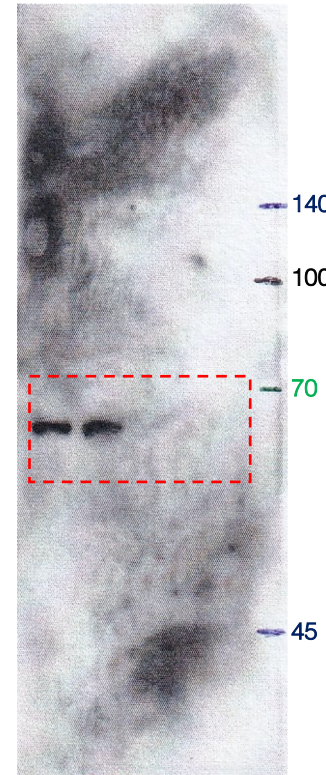

Supplementary  
Figure 2A  
HSC70

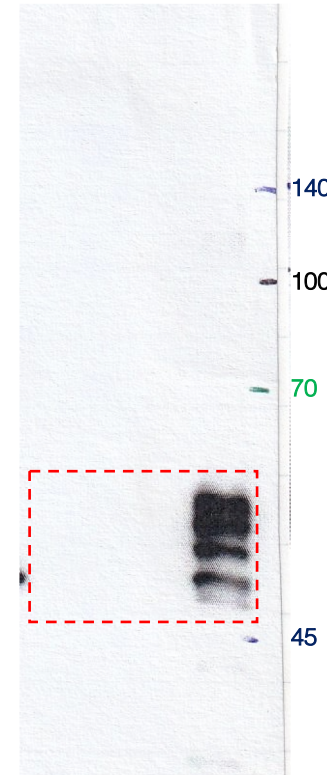

Supplementary  
Figure 2A  
Flag

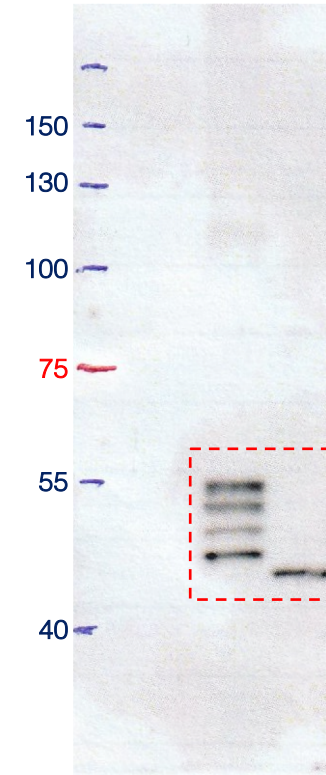

Supplementary  
Figure 2A  
anti-Flag

## GALNTL5

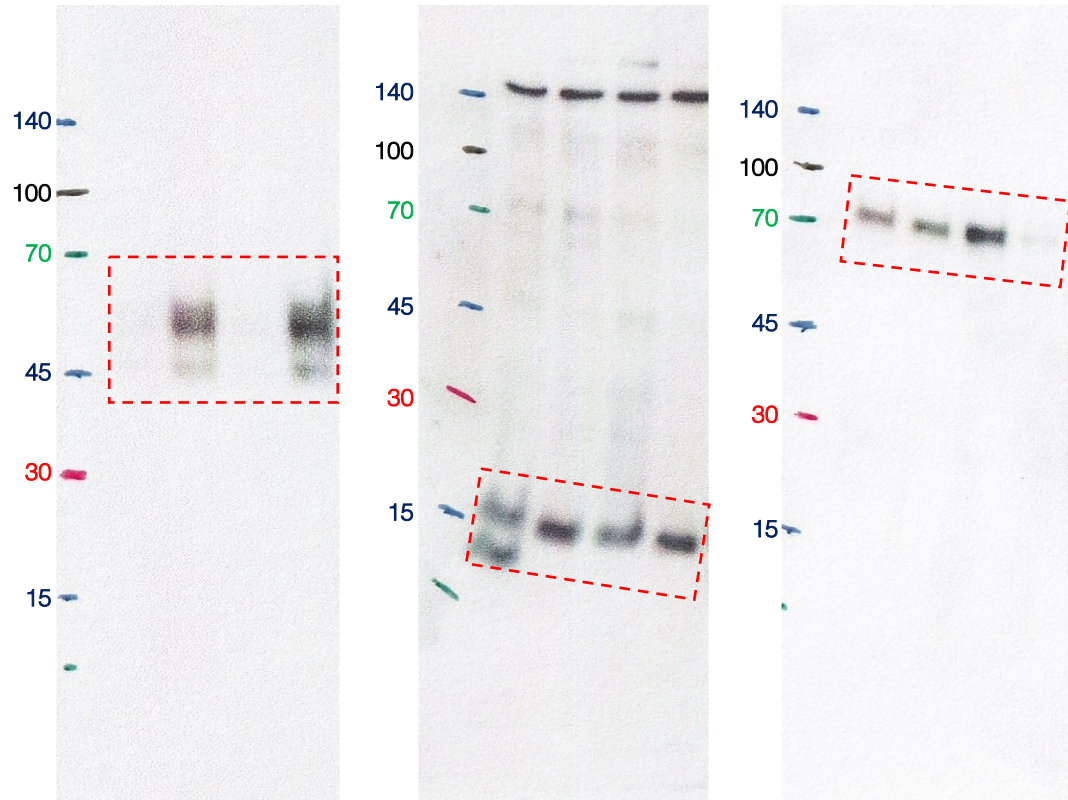

Supplementary  
Figure 5A  
Flag

Supplementary  
Figure 5A  
Histone-H3

Supplementary  
Figure 5A  
NHK-DsRed

## GALNTL5Quad.

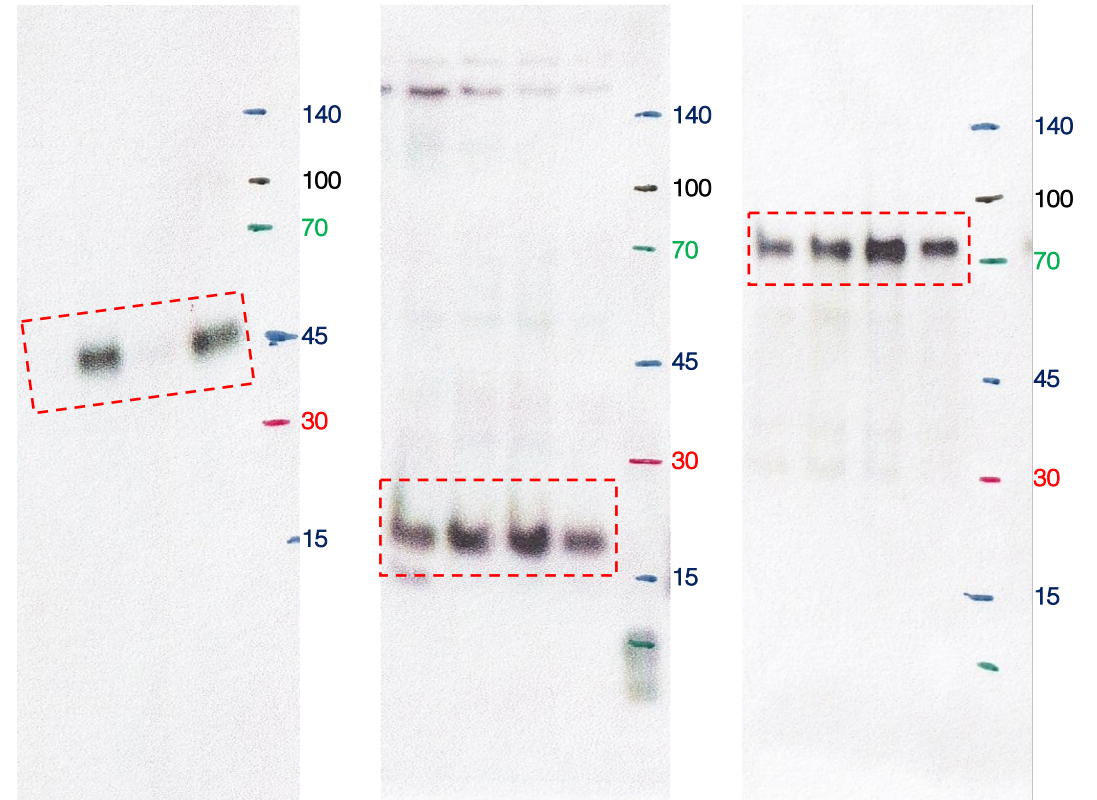

Supplementary  
Figure 5A  
Flag

Supplementary  
Figure 5A  
Histone-H3

Supplementary  
Figure 5A  
NHK-DsRed

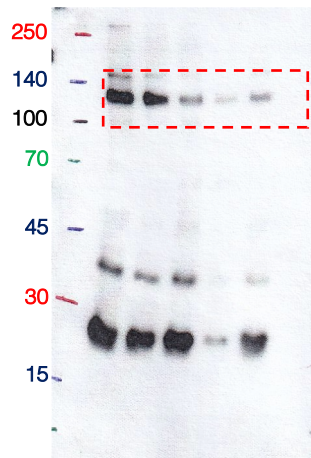

**Supplementary  
Figure 6A  
IRE1α**

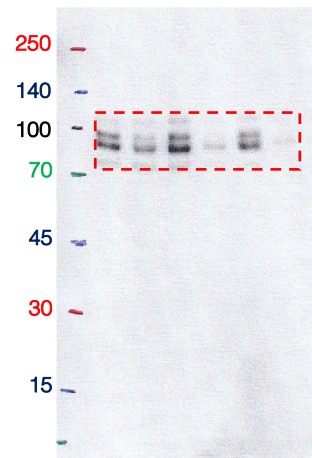

**Supplementary  
Figure 6A  
OS9**

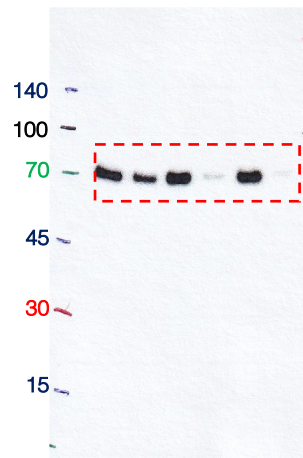

**Supplementary  
Figure 6A  
HSP70**

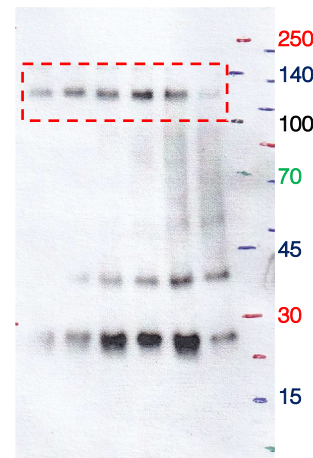

**Supplementary  
Figure 6B  
IRE1α**

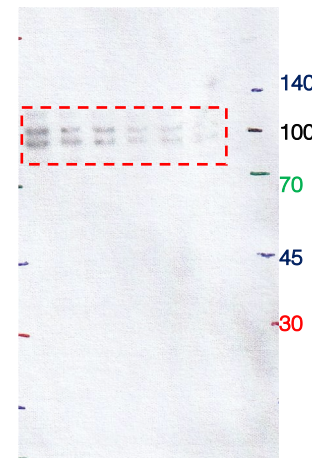

**Supplementary  
Figure 6B  
OS9**

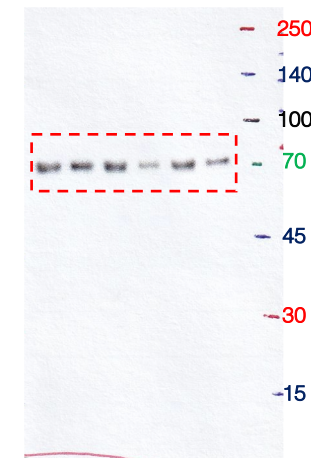

**Supplementary  
Figure 6B  
HSP70**

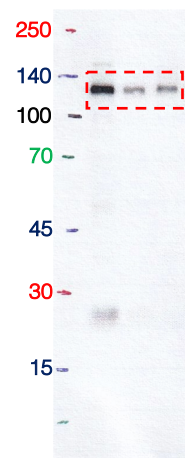

**Supplementary  
Figure 6C  
IRE1α**

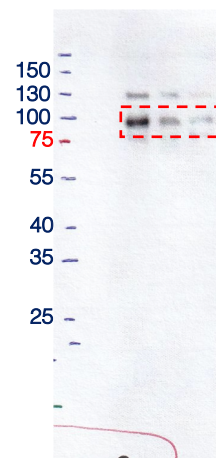

**Supplementary  
Figure 6C  
OS9**

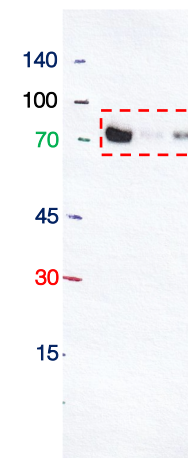

**Supplementary  
Figure 6C  
HSP70**
